# Supplementary material for: Egg-laying and locomotory screens with C. elegans yield a nematode-selective small molecule stimulator of neurotransmitter release
Source: PubMed Central journal article supplement (PMC9402605; doi:10.1038/s42003-022-03819-6), 2022-08-24
Supplement: 42003_2022_3819_MOESM3_ESM.pdf [file 42003_2022_3819_MOESM3_ESM.pdf]

## Description of Additional Supplementary Files

**File name:** Supplementary Movie 1.

**Description:** Example of typical wild type *Caenorhabditis elegans* locomotion. Wild type *C. elegans* (strain N2) are swimming on solid media containing only 1% DMSO solvent control that is incorporated into the agar. Animals have been swimming on the plate for 80 minutes at the time the movie was made.

**File name:** Supplementary Movie 2.

**Description:** Example of compound-induced convulsions. Wild type *C. elegans* (strain N2) are shown after swimming on solid media containing 60  $\mu$ M Nementin-1 for 80 minutes.

**File name:** Supplementary Movie 3.

**Description:** Example of compound-induced coiling. Wild type *C. elegans* (strain N2) are shown after swimming on solid media containing 60  $\mu$ M wact-45 for 80 minutes.

**File name:** Supplementary Movie 4.

**Description:** Example of compound-induced shaking. Wild type *C. elegans* (strain N2) are shown after swimming on solid media containing 60  $\mu$ M Nementin-1 for 80 minutes. At the 18 second mark of the movie, *C. elegans* (strain N2) are shown after swimming on solid media containing 60  $\mu$ M wact-203 for 80 minutes. At the 21 second mark of the movie, 35 wild type *Rhabditophanes diutinus* animals are shown after swimming on solid media containing 60  $\mu$ M Nementin-1 for 170 minutes.

**File name:** Supplementary Movie 5.

**Description:** Example of compound-induced jerky-unc phenotype. Wild-type *C. elegans* (strain N2) are shown after swimming on solid media containing 60  $\mu$ M wact-45 for 80 minutes.

**File name:** Supplementary Movie 6. Example of compound-induced reversal-defective phenotype.

**Description:** Wild type *C. elegans* (strain N2) are shown after swimming on solid media containing 60  $\mu$ M wact-38 for 80 minutes.

**File name:** Supplementary Data 1.

**Description:** Data for Fig. 1 and Fig. 2

**File name:** Supplementary Data 2.

**Description:** Data for Fig. 3

**File name:** Supplementary Data 3.

**Description:** Data for Fig. 4 and Supplementary Fig. 3

**File name:** Supplementary Data 4.

**Description:** Data for Supplementary Fig 4.

**File name:** Supplementary Data 5.

**Description:** Data for Fig. 5

**File name:** Supplementary Data 6.

**Description:** Data for Supplementary Fig. 6

**File name:** Supplementary Data 7.

**Description:** Data for Supplementary Fig. S2
